# Supplementary material for: Ultrasonography in assessing suspected bone fractures: a cross-sectional survey amongst German general practitioners
Source: PubMed Central journal article supplement (PMC6958739; doi:10.1186/s12875-020-1078-5), 2020-01-13
Supplement: 12875_2020_1078_MOESM1_ESM.pdf [file 12875_2020_1078_MOESM1_ESM.pdf]

# Application of medical ultrasound imaging for bone fracture diagnostics in general practice

**Attention:** We kindly ask you to answer all questions in this form completely. Thank you!

## Personal details:

Age:  < 30 years  30 – 40 years  40 – 50 years  50 – 60 years  > 60 years  
Sex:  female  male

In which university did you finish your medicine studies? \_\_\_\_\_

Highest academic degree:  state examination  diploma  doctorate  habilitation

Acquired specializations (please name all and the year of acquisition):

Specialist for \_\_\_\_\_, since: \_\_\_\_\_ (year)

Specialist for \_\_\_\_\_, since: \_\_\_\_\_ (year)

Acquired special designations (please name all and the year of acquisition):

Designation for \_\_\_\_\_, since: \_\_\_\_\_ (year)

Designation for \_\_\_\_\_, since: \_\_\_\_\_ (year)

Designation for \_\_\_\_\_, since: \_\_\_\_\_ (year)

Memberships:  DEGAM  SGAM  Hausärzterverband  none

When did you acquire your latest certificate of advanced education? \_\_\_\_ (year)  I never acquired one.

Practice type:  employed since: \_\_\_\_\_  licensed since: \_\_\_\_\_

## Office details:

Office type:  single practice  joint practice  medical care unit

How would you describe the area where most of your patients come from?

major city  small-town  rural area

Distance to the next hospital (driving minutes by car from office): \_\_\_\_\_ min.

Distance to the next radiologist (driving minutes by car from office): \_\_\_\_\_ min.

Distance to the next surgeon (driving minutes by car from office): \_\_\_\_\_ min.

## Application of medical ultrasound imaging in the office:

Do you own a sonographic device?  yes  no

**In case you own a device**, who is the main user?  myself  others

**In case you own a device**, how many examinations are performed in an average week?

About \_\_\_\_\_ examinations

**In case you own a device**, which organs or structures are most frequently examined?

(multiple selection is possible):

- thyroid gland  upper abdomen  vessels  
 kidneys / urinary tracts  heart (TTE)  joints  
 bone structures  others: \_\_\_\_\_

## Epidemiology:

How many patients with potential bone fractures after a trauma do you examine?

\_\_\_\_\_ x / month if less than 1 x / month: \_\_\_\_\_ / year

While diagnosing potential bone fractures, I feel:

- insecure  rather insecure  rather confident  confident

I consider the diagnostic process to rule out potential bone fractures as:

- very inconvenient  rather inconvenient  rather convenient  convenient

Please turn over!

## Topic assessment:

I am interested in the topic of ultrasonographic imaging for the diagnosis of potential bone injuries.

- not true       rather not true       rather true       true

I think that the application of ultrasonographic imaging for the diagnosis of potential bone injuries may be relevant for my practice.

- not true       rather not true       rather true       true

I think that ultrasonographic imaging for the diagnosis of potential bone injuries can be helpful.

- not true       rather not true       rather true       true

I think that ultrasonographic imaging for the diagnosis of potential bone injuries can simplify medical care.

- not true       rather not true       rather true       true

I think that ultrasonographic imaging for the diagnosis of potential bone injuries makes medical care more efficient.

- not true       rather not true       rather true       true

I think that ultrasonographic imaging for the diagnosis of potential bone injuries is inferior to conventional X-ray.

- not true       rather not true       rather true       true

I already heard about the application of ultrasonographic imaging for the diagnosis of potential bone injuries.

- not true       rather not true       rather true       true

I already thought about the application of ultrasonographic imaging for the diagnosis of potential bone injuries.

- not true       rather not true       rather true       true

I already used ultrasonographic imaging for the diagnosis of potential bone injuries.

- not true       rather not true       rather true       true

## Referral criteria:

If a bone fracture seems **likely**, where will you refer to?

- radiologist       general surgeon       emergency department

If a bone fracture seems rather **unlikely**, where will you refer to?

- radiologist       general surgeon       emergency department       no referral

If a bone fracture seems rather **unlikely**, how secure do you feel about the decision against further diagnostics:

- insecure       rather insecure       rather confident       confident

Do you discuss the likelihood of a bone fracture together with the patient (and his/her relatives)?

- no, never       no, usually       yes, usually       yes, always

Do you decide about further diagnostics together with the patient (and his/her relatives)?

- no, never       no, usually       yes, usually       yes, always

How important are the following criteria for the decision making process of a referral concerning posttraumatic imaging to you?

- |                                  |                                  |                                         |                                        |                                 |
|----------------------------------|----------------------------------|-----------------------------------------|----------------------------------------|---------------------------------|
| anamnesis                        | <input type="radio"/> irrelevant | <input type="radio"/> rather irrelevant | <input type="radio"/> rather important | <input type="radio"/> important |
| pain                             | <input type="radio"/> irrelevant | <input type="radio"/> rather irrelevant | <input type="radio"/> rather important | <input type="radio"/> important |
| swelling                         | <input type="radio"/> irrelevant | <input type="radio"/> rather irrelevant | <input type="radio"/> rather important | <input type="radio"/> important |
| haematoma                        | <input type="radio"/> irrelevant | <input type="radio"/> rather irrelevant | <input type="radio"/> rather important | <input type="radio"/> important |
| functio laesa                    | <input type="radio"/> irrelevant | <input type="radio"/> rather irrelevant | <input type="radio"/> rather important | <input type="radio"/> important |
| persistant afflictions           | <input type="radio"/> irrelevant | <input type="radio"/> rather irrelevant | <input type="radio"/> rather important | <input type="radio"/> important |
| own instincts                    | <input type="radio"/> irrelevant | <input type="radio"/> rather irrelevant | <input type="radio"/> rather important | <input type="radio"/> important |
| scores / clinical decision tools | <input type="radio"/> irrelevant | <input type="radio"/> rather irrelevant | <input type="radio"/> rather important | <input type="radio"/> important |

Which of the following clinical scores for the assessment of potential bone fractures do you know?  
(multiple selection is possible)

- |                                         |                                               |                                                     |                             |
|-----------------------------------------|-----------------------------------------------|-----------------------------------------------------|-----------------------------|
| <input type="radio"/> Neer Score        | <input type="radio"/> Score by Weseley et al. | <input type="radio"/> Score by Solgaard             | <input type="radio"/> other |
| <input type="radio"/> Ottawa Ankle Rule | <input type="radio"/> Ottawa Foot Rule        | <input type="radio"/> Canadian Cervical Spine Rules | <input type="radio"/> none  |
| <input type="radio"/> Ottawa Knee Rule  | <input type="radio"/> Pittsburgh Knee Rule    | <input type="radio"/> Harris Hip Score              |                             |

Thanks for your support!
